# Supplementary material
Source: MDPI journal article supplement (https://www.mdpi.com/2072-4292/5/3/1311)

## Supplementary Information

**Mapping Coral Reef Resilience Indicators Using Field and Remotely Sensed Data. *Remote Sensing* 2013, 5, 1311-1334****Anders Knudby <sup>1,\*</sup>, Stacy Jupiter <sup>2</sup>, Chris Roelfsema <sup>3</sup>, Mitchell Lyons <sup>3</sup> and Stuart Phinn <sup>3</sup>**

<sup>1</sup> Department of Geography, Simon Fraser University, 8888 University Drive, Burnaby, BC, V5A 1S6, Canada

<sup>2</sup> Wildlife Conservation Society, 11 Ma'afu St, Fiji Country Program, Suva, Fiji;  
E-Mail: [sjupiter@wcs.org](mailto:sjupiter@wcs.org)

<sup>3</sup> School of Geography, Planning and Environmental Management, University of Queensland, Brisbane, QLD 4072, Australia; E-Mails: [c.roelfsema@uq.edu.au](mailto:c.roelfsema@uq.edu.au) (C.R.); [m.lyons@uq.edu.au](mailto:m.lyons@uq.edu.au) (M.L.); [s.phinn@uq.edu.au](mailto:s.phinn@uq.edu.au) (S.P.)

\* Author to whom correspondence should be addressed; E-Mail: [aknudby@sfu.ca](mailto:aknudby@sfu.ca);  
Tel.: +1-778-782-3876.

This supplementary supports the main text with following Figures S1-S3:

**Figure 1.** Coral Diversity map.

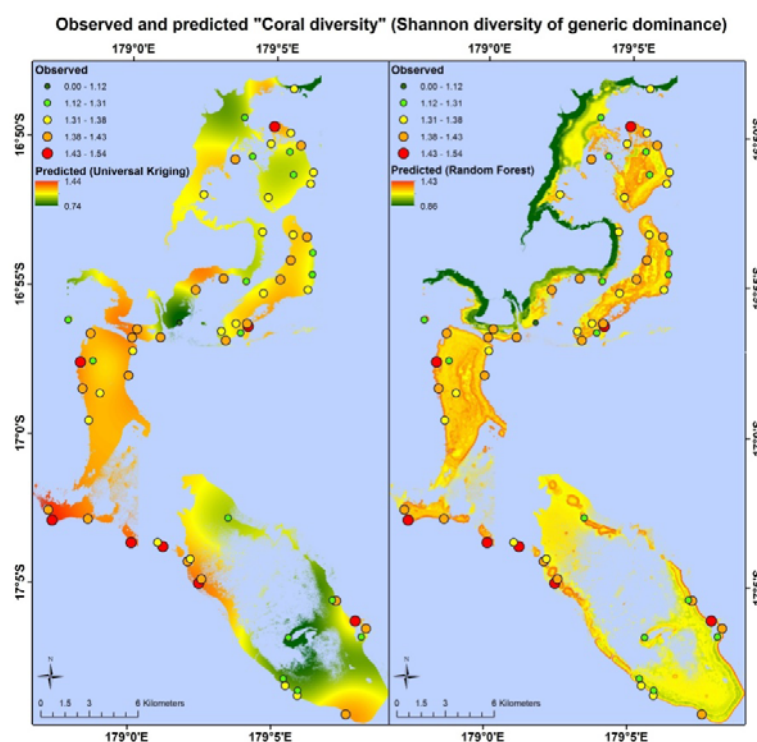

**Figure 2.** Herbivore Biomass map.

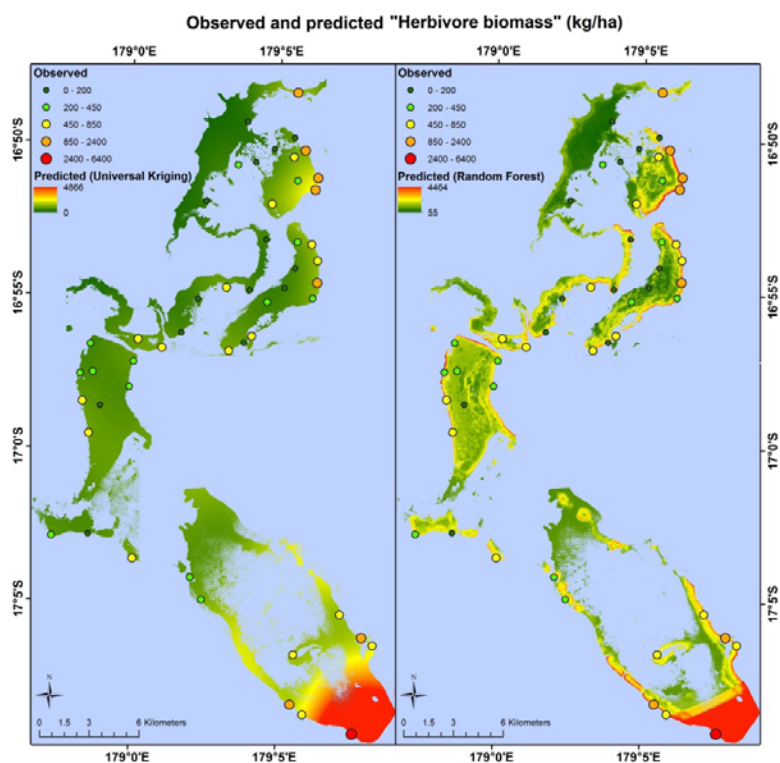

**Figure 3.** Juvenile corals map.

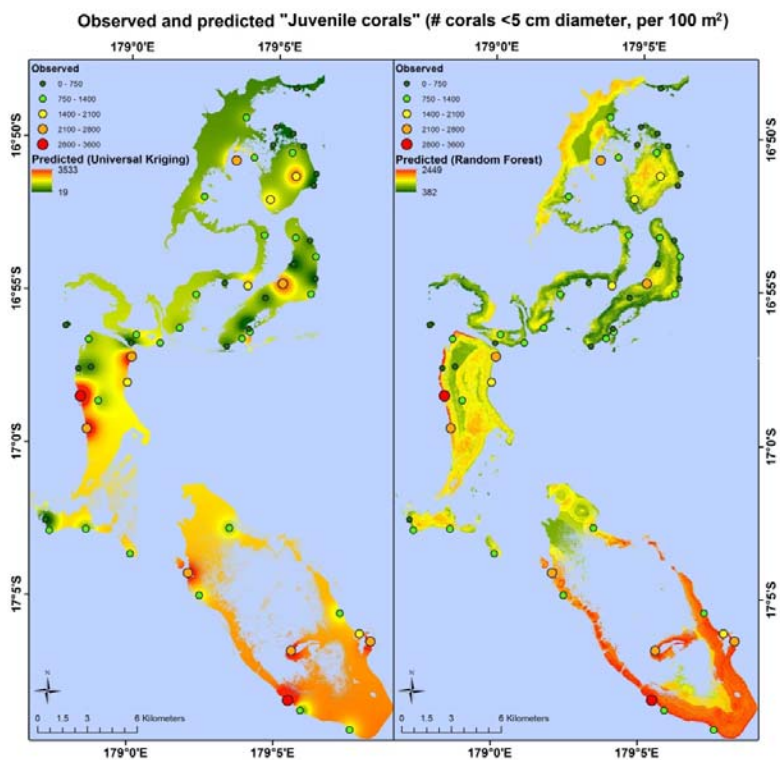

Supplement: s1 [file s1]
